# Vaccinia virus hijacks ESCRT-mediated multivesicular body formation for virus egress

Moona Huttunen<sup>1,2,\*</sup>, Artur Yakimovich<sup>1</sup>, Ian J. White<sup>1</sup>, Janos Kriston-Vizi<sup>1</sup>, Juan Martin-Serrano<sup>3</sup>, Wesley I. Sundquist<sup>4</sup>, Jason Mercer<sup>1,2,\*</sup>

<sup>1</sup> MRC-LMCB, University College London, London, United Kingdom

<sup>2</sup> Institute of Microbiology and Infection, University of Birmingham, Birmingham, United Kingdom

<sup>3</sup> Department of Infectious Diseases, King's College London, London, United Kingdom

<sup>4</sup> Department of Biochemistry, University of Utah, Utah, United States

\* Correspondence: [J.P.Mercer@bham.ac.uk](mailto:J.P.Mercer@bham.ac.uk), [M.K.Huttunen@bham.ac.uk](mailto:M.K.Huttunen@bham.ac.uk)

**Unlike most enveloped viruses, poxvirus egress is a complex process whereby cytoplasmic single membrane-bound virions are wrapped in a cell-derived double membrane. These triple membrane-bound particles, termed intracellular enveloped virions (IEVs), are then released from infected cells by fusion. While the wrapping double membrane is thought to be derived from virus-modified trans-Golgi or early endosomal cisternae, the cellular factors that regulate virus wrapping remain largely undefined. To identify novel cell factors required for this process the prototypic poxvirus, vaccinia virus (VACV), was subjected to a high-throughput RNAi screen directed against cellular membrane trafficking proteins. Focusing on the endosomal sorting complexes required for transport (ESCRT), we demonstrate that ESCRT-III and VPS4 are required for packaging of virus into multivesicular bodies (MVBs). EM-based characterization of these MVB-IEVs showed that they account for half of IEV production indicating that MVBs serve as a second major source of VACV wrapping membrane. These data support a model whereby, in addition to cisternae-based wrapping, VACV hijacks ESCRT-mediated MVB formation to facilitate virus egress and spread.**

Virus egress | Vaccinia virus | Multivesicular bodies | ESCRT machinery | VPS4 | Virus wrapping

## INTRODUCTION

All enveloped viruses must modulate cellular membrane systems throughout their lifecycles, from hijacking endosomes for entry and diverting cellular membrane compartments for replication, to taking over cellular secretion systems for viral egress and immune evasion (Welsch *et al*, 2007; Mercer *et al*, 2010; Glingston *et al*, 2019). As exclusively cytoplasmic replicating viruses, poxviruses, are no exception to this rule (Moss, 2007). Moreover, as these viruses produce two distinct infectious virion forms - with multiple membranes sequestered from different cellular membrane compartments -

poxviruses are perhaps more reliant on modulating cellular membrane compartments than most other enveloped viruses.

The formation of these distinct infectious virus forms termed intracellular mature virions (IMVs) and extracellular enveloped virions (EEVs) begins with the assembly of single-membrane IMVs in viral factories (Moss, 2007). Once formed, a subset of IMVs is transported to designated wrapping sites where they acquire two additional virus-modified membranes (Smith *et al*, 2002; Condit *et al*, 2006; Moss, 2007; Roberts & Smith, 2008). These triple-membrane virions termed intracellular enveloped virions (IEVs) are then transported to the cell surface where they undergo fusion. Leaving behind their outermost membrane, these double membrane virions remain as cell-associated enveloped virions (CEVs) or are released to become EEVs.

The wrapping membranes contain nine viral proteins not found in IMVs, some of which direct the processes of wrapping and cell surface transport (Smith *et al*, 2002; Roberts & Smith, 2008). The EV membranes themselves have been reported to be derived from trans-Golgi (TGN) and/or endosomal cisternae (Smith *et al*, 2002; Condit *et al*, 2006; Moss, 2007; Roberts & Smith, 2008). However, the cellular machinery involved in IMV wrapping/IEV formation, is largely unknown.

It is generally accepted that many enveloped viruses exit cells by budding from the plasma membrane (Welsch *et al*, 2007). To achieve this numerous viruses rely on cellular endosomal sorting complexes required for transport (ESCRT) machinery, which mediates reverse topology cellular fusion events such as the formation of intraluminal vesicles (ILVs) and cytokinesis (McCullough *et al*, 2013; Scourfield & Martin-Serrano, 2017; Vietri *et al*, 2020). ESCRT includes five core complexes required for recognition, clustering and nucleation of ubiquitinated cargoes (ESCRT-0, ESCRT-I and ESCRT-II), filament formation for membrane pinching (ESCRT-III), and an AAA+ ATPase for the scission, and for removing ESCRT complexes after fusion (VPS4) (McCullough *et al*, 2013; Vietri *et al*, 2020).

Interestingly, it has been reported that depletion of TSG101, a component of ESCRT-I, or ALIX - an

ESCRT accessory protein - reduces EEV formation (Honeychurch *et al*, 2007). Intrigued by our identification of TSG101 and VPS4 in a high-throughput RNAi screen for cell factors that impact virus spread, we decided to pursue the role of ESCRT machinery during VACV infection. This led to the identification of ESCRT-mediated VACV wrapping and the discovery that multivesicular bodies (MVBs) serve as a major non-cisternae membrane source for the formation of IEVs.

## RESULTS

### Membrane trafficking RNAi screen implicates ESCRT machinery in VACV spread

To identify novel cell factors used by VACV to facilitate virus spread we developed a fluorescent plaque formation assay compatible with RNAi screening (Fig. 1A). For this we used a virus (VACV E-EGFP L-mCherry) that expresses EGFP and mCherry under the control of an early or late viral promoter, respectively. HeLa cells were treated with RNAi targeting various membrane trafficking proteins for 72 h (Fig. 1A and Table S1). Cells were then infected with VACV E-EGFP L-mCherry at MOI 0.02, and at 8 hours post infection (hpi) viral DNA replication and late gene expression were inhibited using cytosine arabinoside (AraC) (Schabel Jr., 1968; Furth & Cohen, 1968), after which infection was allowed to proceed for a further 16 h. This workflow resulted in fluorescent plaques containing magenta primary infected cells surrounded by green secondary infected cells (Fig. 1A). Cells were stained for nuclei, imaged and quantified for cell number and infection markers (mCherry and EGFP). Quantification of the number of primary (magenta) and secondary infected (green) cells allowed us to differentiate between defects in primary infection and defects in virus spread, both of which result in attenuated plaque formation. Of the 224 cell factors screened, 42 reduced VACV spread by 25% or more (Fig. 1B, Table S1). Hits were assigned to functional annotation clusters using DAVID (Huang *et al*, 2009a, 2009b). Protein-protein interactions within and between clusters were mapped using STRING (Szklarczyk *et al*, 2019) (Fig. 1B). Enriched functional clusters included Rab GTPases, endocytosis related proteins (actin and clathrin), and SNAP-SNARE receptors.

The identification of actin and clathrin regulatory proteins is consistent with their role in actin tail formation during VACV infection (Leite & Way, 2015). The large number of Rab GTPases and set of SNAP-SNARE proteins identified is also in line with the role of retrograde trafficking for the recycling and transport of wrapping proteins from the plasma membrane to the Golgi (Harrison *et al*, 2016; Sivan *et al*, 2016).

Two additional small clusters were identified, autophagy and ESCRT machineries (Fig. 1B). The

autophagy cluster is composed of ATG12, Beclin 1 and LC3A, of which ATG12 was implicated in virus-mediated inhibition of autophagy (Moloughney *et al*, 2011). The ESCRT cluster contains ESCRT machinery proteins (TSG101 and VPS4A) and a protein related to ESCRT machinery function (NEDD4) (Fig. 1B). It has been shown that depletion of TSG101 or the accessory protein ALIX reduce EEV yield when HeLa cells are infected with VACV (Honeychurch *et al*, 2007). Our screen showed that RNAi-mediated depletion of TSG101, VPS4A, and NEDD4 caused a reduction of 39%, 60%, and 34% in virus spread (Table S1), and a concomitant reduction in VACV plaque formation (Fig. 1C). As a validation step, we depleted TSG101 or ALIX and determined IMV and EEV yields 24 hpi. Immunoblot analysis indicated that TSG101 and ALIX were reduced by 77% and 96%, respectively (Fig. 1D). While IMV yields were unaffected by loss of either protein (Fig. 1E), EEV yields were reduced by 25% upon knockdown of TSG101, and 41% upon knockdown of ALIX (Fig. 1F).

Collectively the RNAi screen uncovered a subset of cellular factors and processes required for VACV spread. The identification and validation of ESCRT components is consistent with the reported role of TSG101 and ALIX in VACV EEV formation (Honeychurch *et al*, 2007). As mechanistic understanding of the role of ESCRT machinery in poxvirus wrapping and/or egress is lacking, we chose to focus on determining the role(s) of ESCRT complexes during VACV infection.

### VPS4B is a pro-viral factor required for VACV EEV formation

Mammalian cells express two forms of the ESCRT ATPase; VPS4A and VPS4B (Scheuring *et al*, 2001). Having identified VPS4A AAA ATPase in the screen we depleted VPS4A and VPS4B individually to further investigate the role of ESCRT machinery in VACV infection. In this case knockdowns over 48 h, as opposed to 72 h, were used. Using the spread screen (Fig. 1A) under these conditions we found that depletion of VPS4B, but not VPS4A, reduced virus spread (Fig. 2A). Analysis of primary and secondary infection showed that depletion of VPS4A did not impact primary infection but was highly variable with regard to secondary infection, while depletion of VPS4B reduced the number of secondary infected cells without impacting the number of primary infected cells relative to control siRNA (Fig. 2A; inset).

To distinguish between the two, mRNA levels were assessed under these experimental conditions. VPS4A was found to be expressed at over 2-fold greater levels in control RNAi-treated cells than VPS4B (Fig. 2B; siSCR). Depletion of VPS4A and VPS4B was very effective with >99% knockdown efficiency in both cases (Fig. 2B).

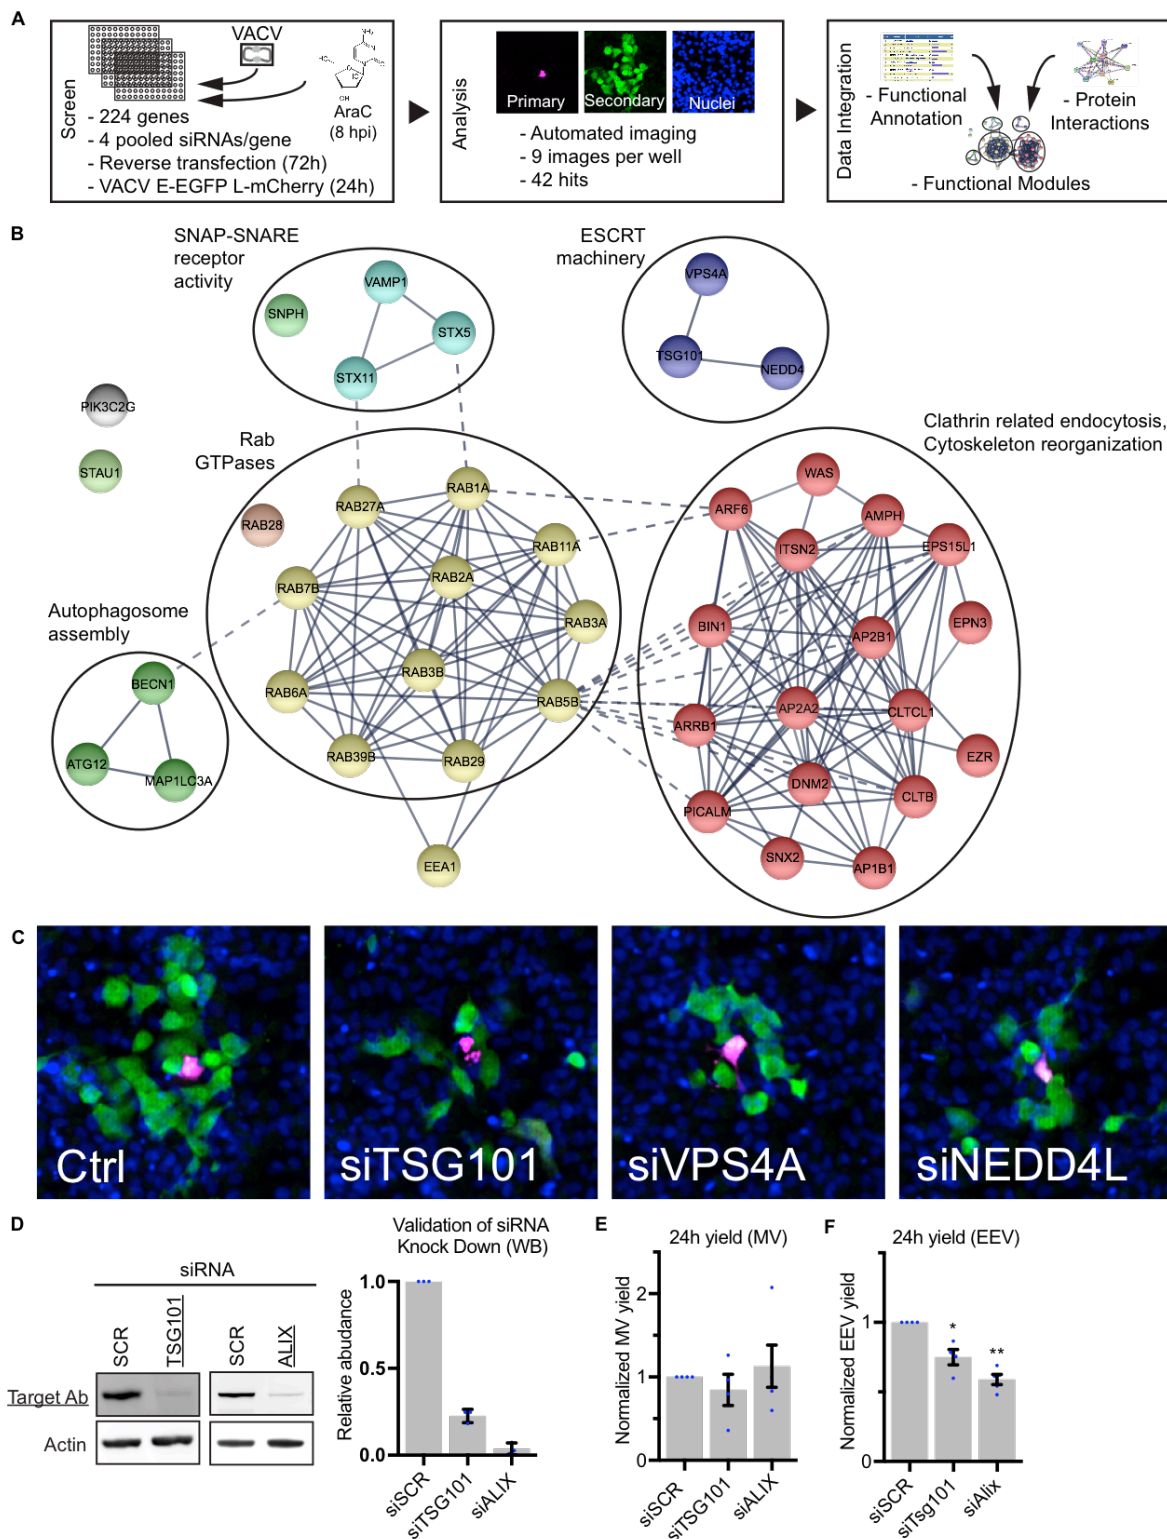

**Figure 1: RNAi screen targeting membrane trafficking proteins reveals 42 EV egress factor candidates.** (A-C) A siRNA screen targeting cellular membrane trafficking factors was used to identify host cell proteins required for EV related viral egress. Transfected HeLa cells were infected with VACV strain expressing EGFP from early and mCherry from late viral promoters (E- EGFP L-mCh), and the fractions of early and late infected cells were quantified. Workflow and screening strategy are shown in (A). (B) Gene knockdowns that decreased late/early infection ratio 25% or more were selected as hits. The final 42 hit candidate genes are shown grouped in functional modules.  $n = 2$ . See also Supplement Data. (C) Representative images of ESCRT machinery module hits. Blue = DAPI, magenta = late infection, green = early infection. (D) Western Blot validations (WB) of siRNA knockdown efficiencies for TSG101 and ALIX. Data is mean  $\pm$ SEM,  $n = 3$ . Statistical analysis was performed using unpaired two-tailed t-test (\*\*\*\* $P < 0.0001$ ). (E and F) 24 h intracellular mature virion (IMV) and extracellular enveloped virion (EEV) yields from control (siSCR), TSG101 and ALIX depleted cells. Data are mean  $\pm$ SEM,  $n = 4$ , normalized to control (siSCR). Statistical analysis was performed using unpaired two-tailed t-tests (\* $P < 0.05$ ; \*\* $P < 0.01$ ).



We noted that depletion of VPS4A resulted in a 2.5-fold increase in VPS4B expression, while depletion of VPS4B reduced VPS4A mRNA by 25% relative to control cells (Fig. 2B). These results suggested that VPS4B, but not VPS4A, might affect the EV related egress of VACV.

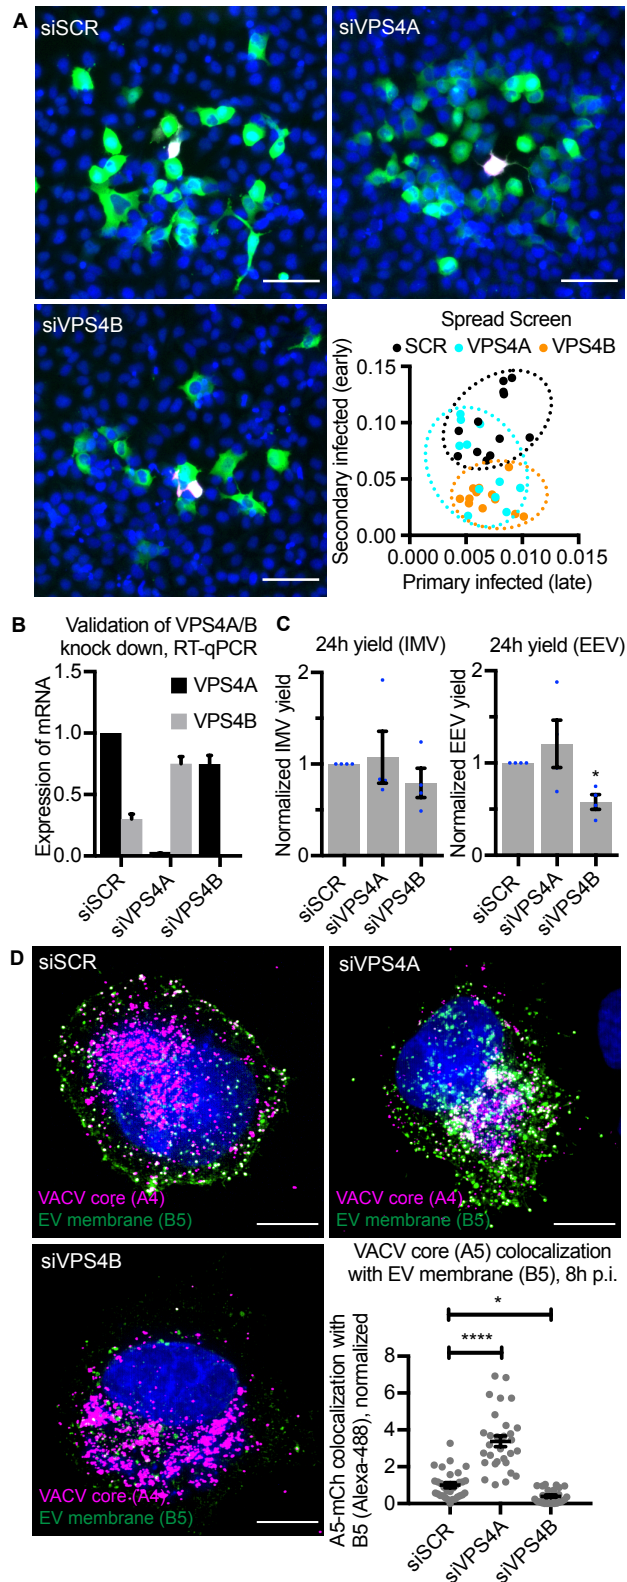

To assess this, cells depleted for VPS4A or VPS4B were infected with VACV and the production of IMVs and EEVs assessed at 24 h (Fig. 2C). Consistent with the spread screen (Fig 2A), loss of either VPS4A or VPS4B had no impact on IMV formation. On average, loss of VPS4A showed no defect in the number of EEVs produced, while EEVs were down 42% upon depletion of VPS4B (Fig. 2C).

Given the role of ESCRT machinery in membrane budding and fission we reasoned that VPS4B was either involved in the intracellular wrapping of virions or their budding and release at the cell surface. To differentiate between these two, cells depleted for VPS4A or VPS4B were infected with VACV containing a fluorescent core (WR A5-EGFP). At 8 hpi cells were fixed and stained for the VACV envelope protein B5 which is required for virus wrapping (Engelstad & Smith, 1993) and in this assay, marks wrapping membranes, IEVs and CEVs. As expected, in control cells significant colocalization between core (A5) and EV membrane protein (B5) was seen at the cell periphery consistent with the formation of IEVs and CEVs (Fig. 2D, siSCR). Colocalization of these two signals appeared to increase in VPS4A depleted cells with high colocalization within wrapping sites at the cell periphery (Fig. 2D, siVPS4A). In contrast, loss of VPS4B appeared to cause a decrease in colocalization with core signal (A5) often appearing adjacent to the B5 positive wrapping membrane signal within cells (Fig. 2D, siVPS4B). Quantification showed that relative to control cells, in VPS4A depleted cells colocalization between these two markers increased by 3-fold, whereas in VPS4B depleted cells colocalization was decreased by 60% (Fig. 2D; inset).

Upon VPS4B depletion we did not see accumulation of virions at the cell periphery and little colocalization between core and IEV wrapping membrane. Knockdown of VPS4A, which increased expression of VPS4B, resulted in a complementary increase in core/wrapping membrane colocalization indicating that VPS4B is a pro-viral factor involved in VACV EEV formation.

**Figure 2: VPS4 plays a role in IMV wrapping and VACV spreading.** (A) Representative images and quantification of EV related spreading on VPS4A/B depleted HeLa cell monolayers. Blue = DAPI, magenta = late infection, green = early infection. n = 2. Scale bars 50µm. (B) RT-qPCR validations of siRNA knockdown efficiencies for VPS4A/B. Data is mean ±SEM, n = 3. (C) 24 h intracellular mature virion (IMV) and extracellular enveloped virion (EEV) yields in control (siSCR) and VPS4A/B depleted cells. Data are mean ±SEM, n = 4, normalized to control (siSCR). Statistical analysis was performed using unpaired two-tailed t-tests (\*P < 0.05). (D) Representative images (maximum intensity projections) of VACV (mCh-A4) infected VPS4 depleted HeLa cells 8 hpi, and quantification of VACV core and EV membrane protein (B5) colocalization. Blue = DAPI, magenta = VACV core (A4), green = VACV envelope protein B5. Scale bars 10µm. Data is mean ±SEM, three biological replicates, representative of n = 30 cells per condition. Statistical analysis was performed using unpaired, nonparametric Kolmogorov-Smirnov test (\*\*P < 0.01; \*\*\*\*P <



## ESCRT-III complex contributes to VACV intracellular wrapping

The above results suggested that ESCRT machinery is involved in intracellular wrapping of newly assembled VACV virions (or IMVs). Following this hypothesis, we sought to investigate the involvement of ESCRT-III. To this end we depleted components of ESCRT-III (CHMP1A, CHMP1B, CHMP2B, CHMP3, CHMP4A, CHMP4B, CHMP4C, CHMP5 and CHMP6) using siRNA. Immunoblot or RT-qPCR analyses indicated that each factor was depleted by 50% or more (Fig. 3A-C). As the original spread screen did not differentiate between reduced IMV or EEV production in primary infected cells, 24 h yields were used to assess the impact of ESCRT-III depletion on VACV IMV and EEV formation. No defect in IMV formation was seen upon loss of any ESCRT-III components tested (Fig. 3D). Conversely, loss of CHMP1A, CHMP3, CHMP4C, and CHMP6 each reduced EEV yield by 25-44%, and depletion of CHMP4B and CHMP5 increased EEV yield by 95% and 44%, respectively (Fig. 3E). These results indicated that in addition to VPS4, ALIX and TSG101, multiple components of ESCRT-III are involved in VACV EEV formation.

As before, to determine the stage of EEV formation that ESCRT-III components are involved in, cells were depleted of CHMP1A, CHMP3, CHMP4B,

CHMP4C, CHMP5 or CHMP6 and infected with WR A5-EGFP virus. At 8 hpi cells were fixed and stained for the EV membrane marker B5. Control cells and those depleted of CHMP4B or CHMP5 displayed the expected distribution of core and EV markers, with colocalization occurring within perinuclear wrapping sites and in wrapped virions at the cell periphery (Fig. 4A; see ROIs). Cells depleted of CHMP1A, CHMP3, CHMP4C and CHMP6 showed a markedly different phenotype. With the exception of CHMP4C depletion, in which B5 distribution was dispersed, cells depleted of CHMP1A, CHMP3 and CHMP6 contained enlarged vesicular structures positive for the EV membrane marker B5. Strikingly, in these cells multiple IMVs (indicated by core only marker; A5) appeared to be associated with the limiting membrane of these B5-positive vesicular structures (Fig. 4A; see ROIs). The phenotypes were quantified using core/EV membrane marker colocalization as a proxy for IEV formation (Fig. 4B). In line with the EEV yields, depletion of CHMP4B and CHMP5 showed a trend of increased colocalization, while knockdown of CHMP1A, CHMP3, CHMP4C or CHMP6 resulted in 47%, 70%, 27% and 72% less colocalization, respectively, when compared to control cells (Fig. 4B). These results are in further support of ESCRT-mediated intracellular VACV wrapping.

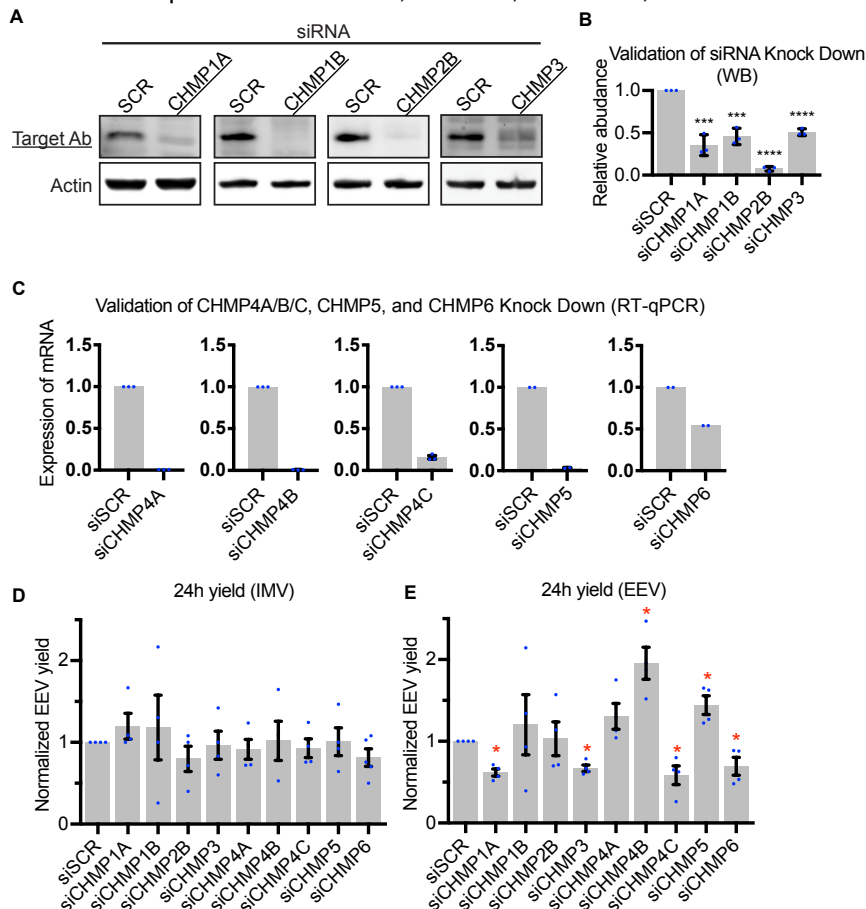

**Figure 3: ESCRT-III has a role in formation of EEVs. (A and B)** Western Blot (WB) validations of siRNA knockdown efficiencies for selected CHMP proteins in HeLa cells. Data is mean  $\pm$ SEM,  $n = 3$ , normalized to control (siSCR). Statistical analysis was performed using unpaired two-tailed t-tests (\*\*\*\* $P < 0.0001$ ). **(C)** RT-qPCR validation of siRNA knockdown efficiencies for CHMP4A/B/C, CHMP5 and CHMP6 depletions in HeLa cells. Data is mean  $\pm$ SEM,  $n = 3$  for CHMP4A/B/C and  $n = 2$  for CHMP5 and CHMP6, normalized to control (siSCR). Statistical analysis was performed using unpaired two-tailed t-tests (\*\*\*\* $P < 0.0001$ ). **(D and E)** 24 h intracellular mature virion (IMV) and extracellular enveloped virion (EEV) yields in control (siSCR) and CHMP depleted cells. Data are mean  $\pm$ SEM,  $n = 4$ , normalized to control (siSCR). Statistical analysis was performed using unpaired two-tailed t-tests (\* $P < 0.05$ ).

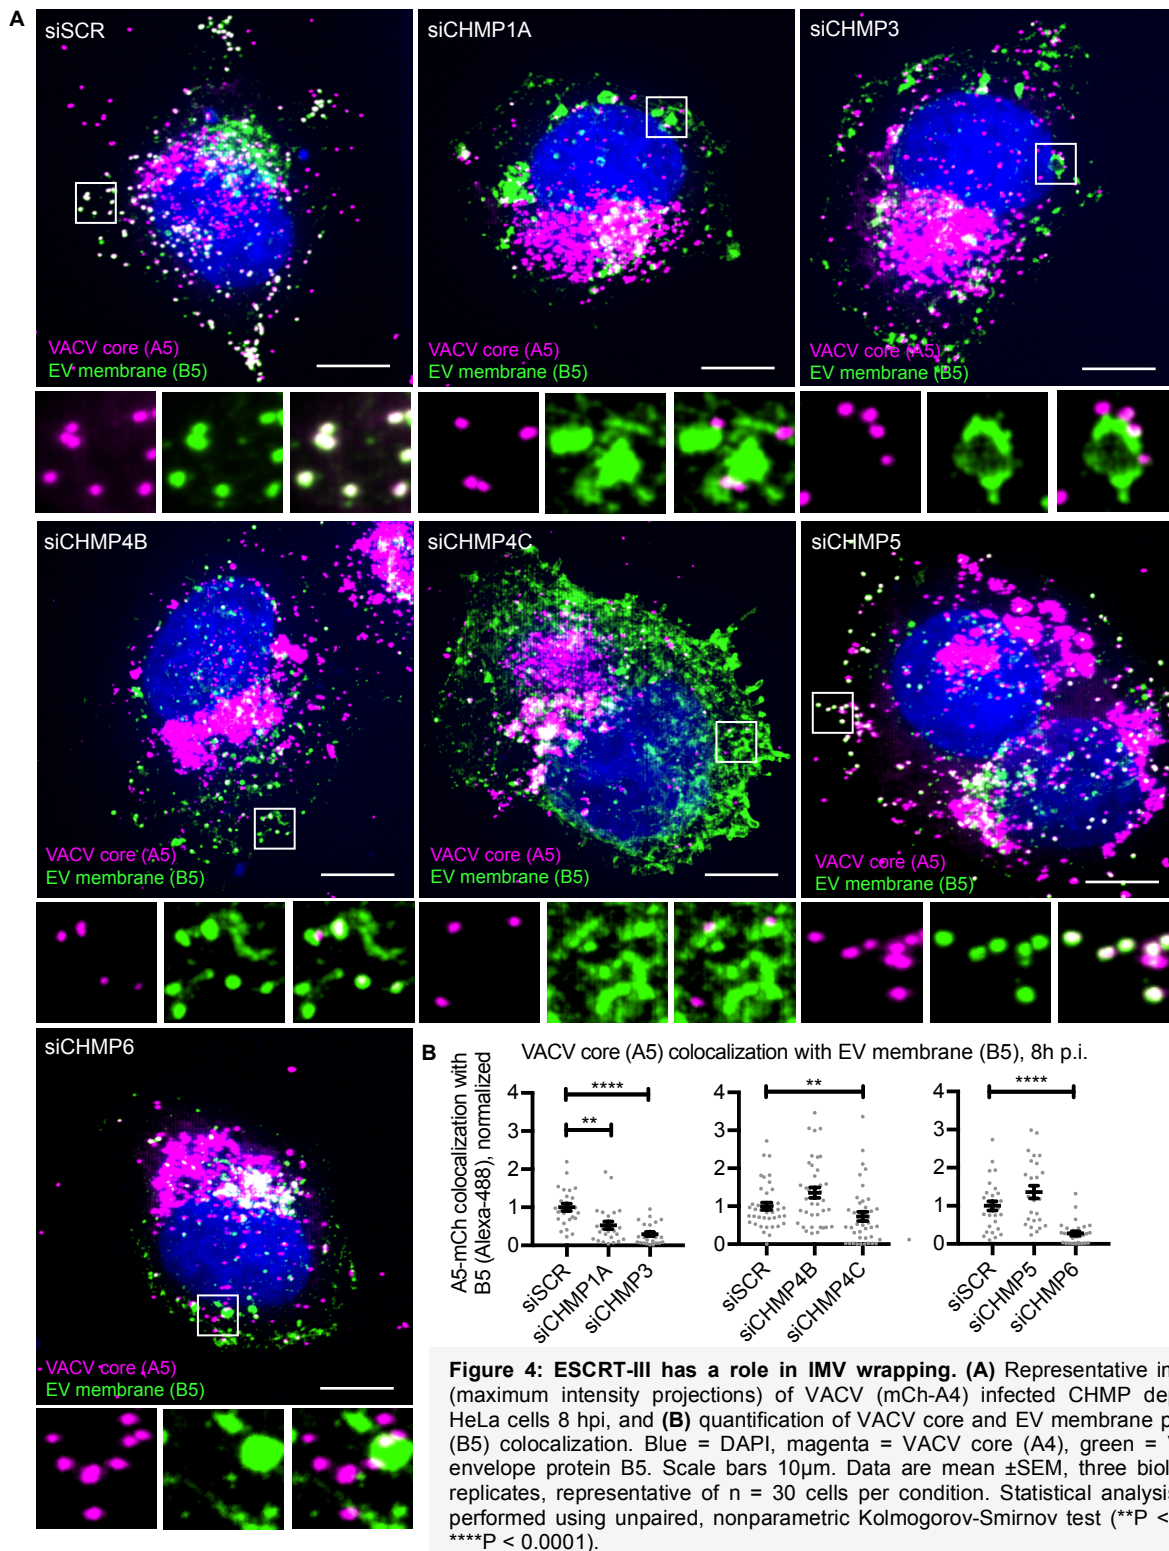

### VACV virions associate with cisternae and MVBs within wrapping sites

VACV IMV wrapping takes place adjacent to viral factories in the area of the microtubule organizing center. It has been reported that wrapping cisternae are derived solely from the TGN (Hiller & Weber, 1985; Schmelz *et al*, 1994). This, however, is controversial as early endosomal cisternae and late endosomal structures have also been implicated in wrapping

(Tooze *et al*, 1993; Husain & Moss, 2001; Chen *et al*, 2009), and Brefeldin A (BFA) - which collapses the TGN - decreases but does not fully attenuate EEV formation (Ulaeto *et al*, 1995). To get an overview of membranous organelles in the vicinity of cytosolic VACV wrapping sites we infected cells with a virus that express a fluorescent version of the EV membrane protein F13.



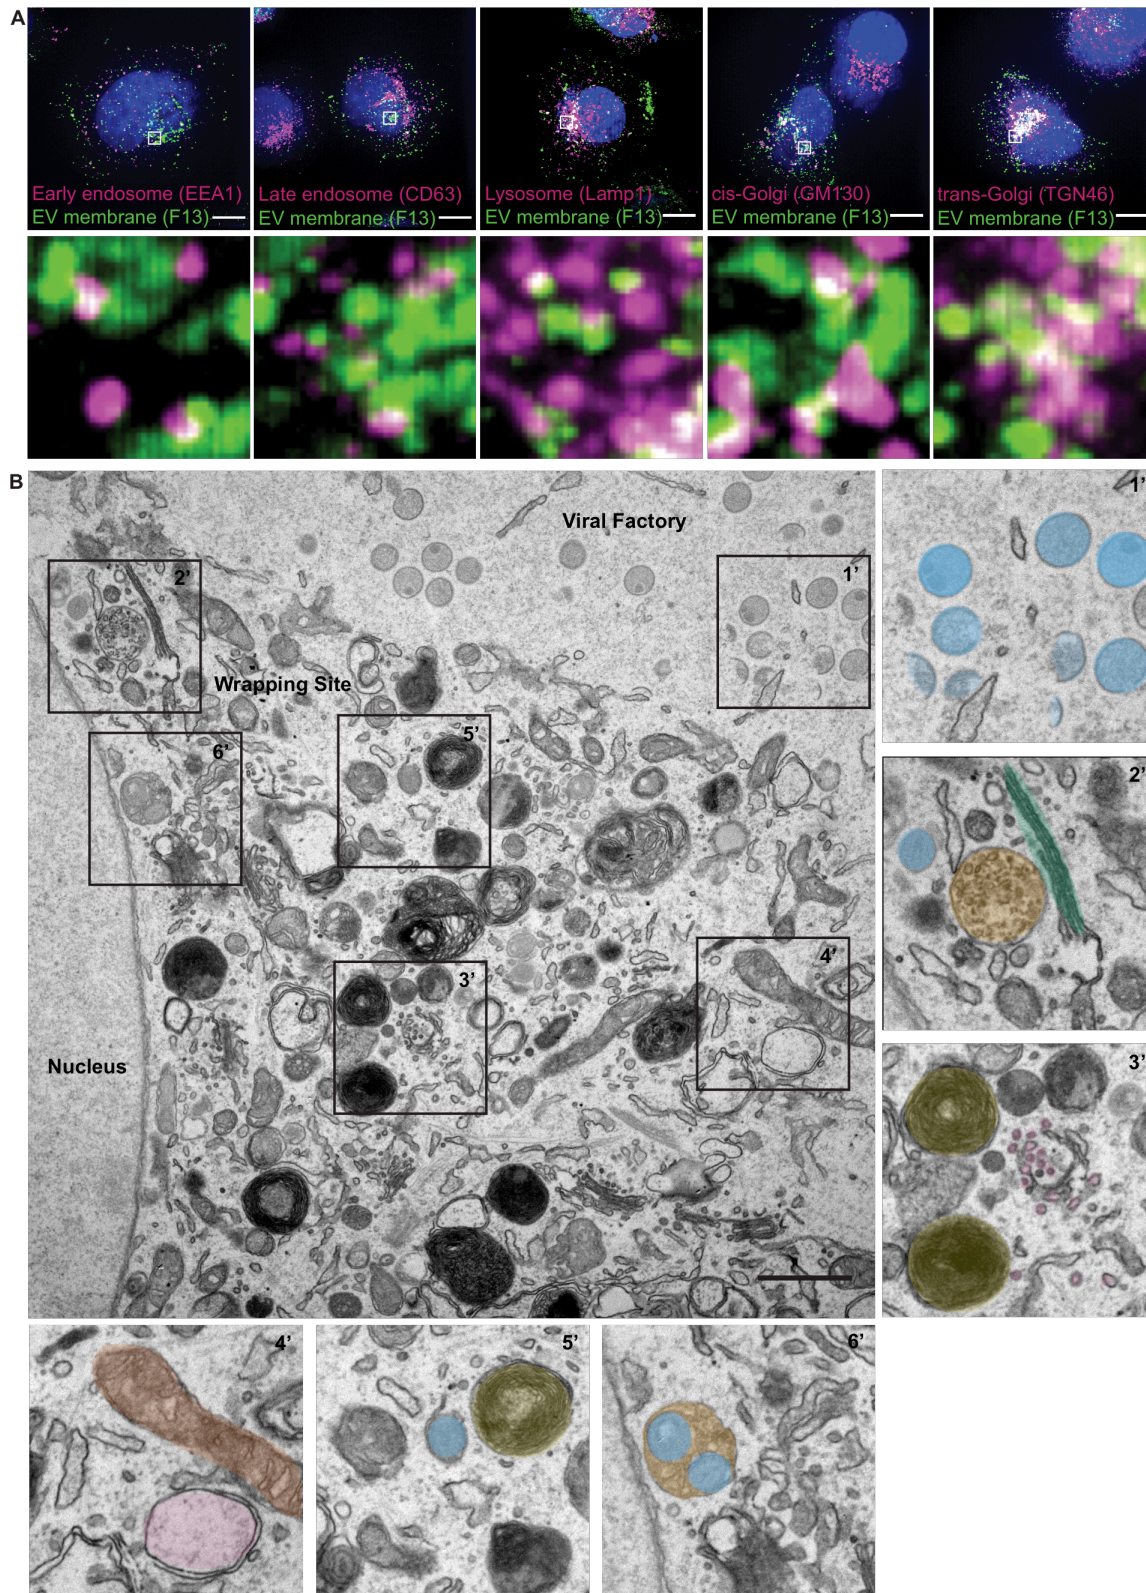

**Figure 5: MVBs serve as a second major source of VACV wrapping membrane.** (A) Immunofluorescent (IF) imaging 8 hpi shows several cellular membrane markers in close proximity of EV membrane protein F13 (EEA1, CD63, Lamp1, GM130, and TGN46). Maximum intensity projections. Scale bars 10  $\mu$ m. (B) EM imaging 8 hpi illustrates the location of viral replication site (viral factory) with different stages of MV morphogenesis (crescents and IVs (1')). In addition, the imaging shows that in the areas of IMV wrapping, various cellular membrane structures are in close proximity of wrapping virions. 2': blue = IMV, green = Golgi stacks, orange = multivesicular body (MVB), 3': yellow = lysosomes, purple = small vesicles, 4': brown = mitochondria, pink = early endosome, 5': blue = wrapping virion, yellow = lysosome, 6': orange/blue = virions bud into MVB. Scale bars 1  $\mu$ m.



At 8 hpi cells were fixed and stained for markers of early endosomes (EEA1), late endosomes (CD63), lysosomes (LAMP1), cis-Golgi (GM130) or TGN (TGN46). Qualitatively, the TGN showed the largest amount of overlap with VACV EV membrane protein F13 as expected, while late endosome, lysosome and cis-Golgi all showed some overlap with F13 (Fig. 5A).

As we noted a large variety of cellular membrane structures within the vicinity of virion wrapping sites we used transmission electron microscopy (TEM) to further investigate their association with virions during wrapping (Fig. 5B). An overview of infected cell 8 hpi

shows that viral factories containing hallmarks of viral morphogenesis (crescents and immature virions, IVs) are largely devoid of cellular membrane structures (Fig. 5B; 1'). Consistent with the immunofluorescence (IF) imaging (Fig. 5A), VACV wrapping sites - in addition to virions - were packed with various cellular membranes including Golgi stacks and MVBs (Fig. 5B; 2'), late endosomes, lysosomes, small vesicles/tubules, early endosomes and mitochondria (Fig. 5B; 3' and 4'). Amongst all of these cellular organelles we saw evidence of cisternae-based IMV wrapping (Fig. 5B 5') and we also found virions within MVBs (Fig. 5B; 6').

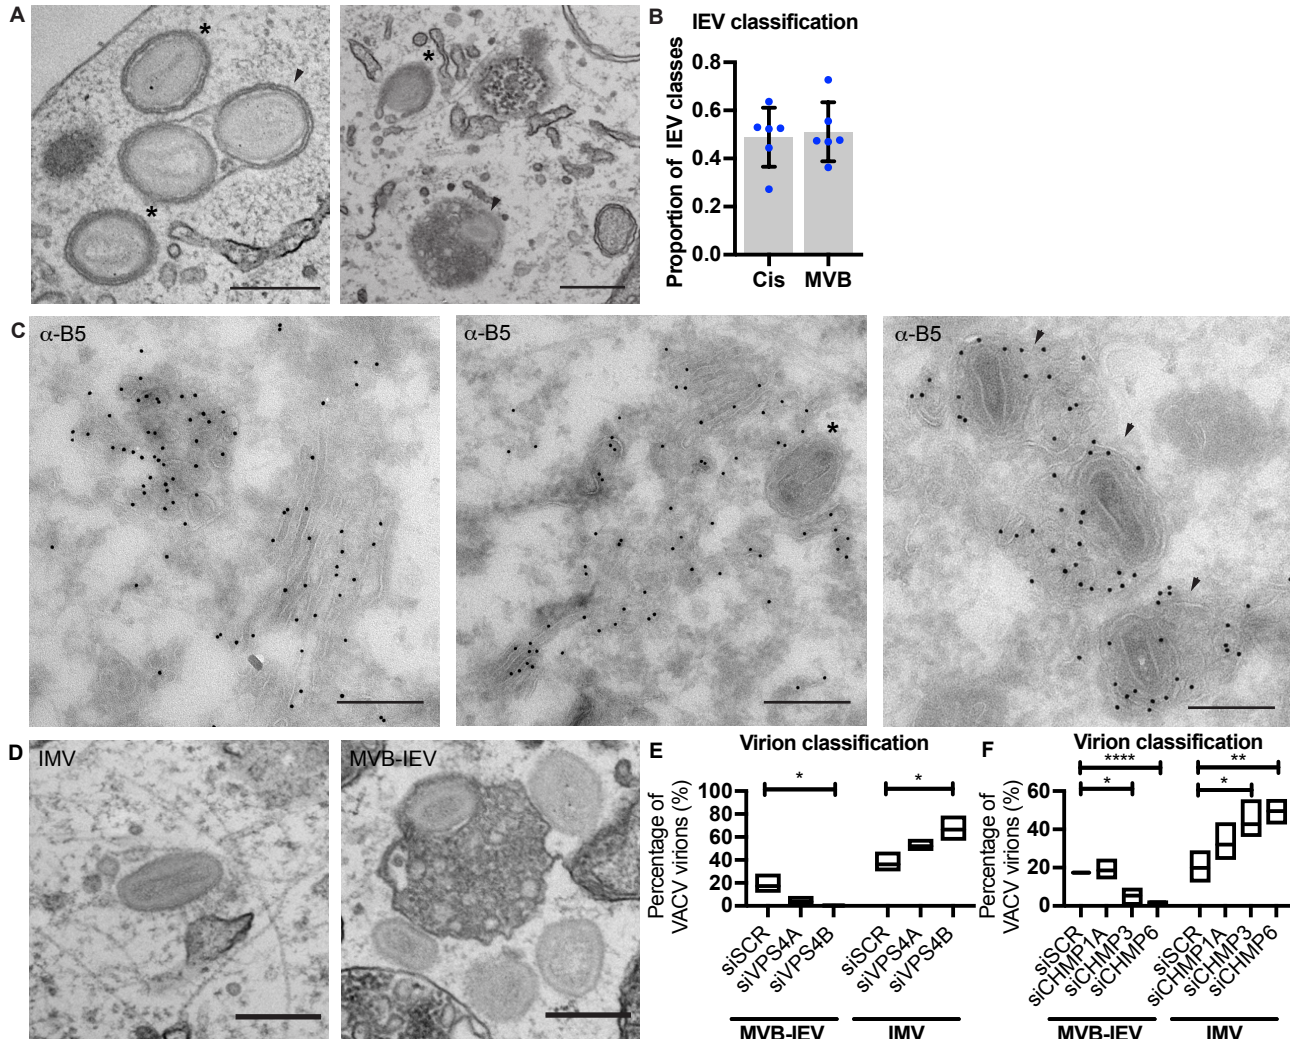

**Figure 6. Formation of MVB-IEVs is dependent of ESCRT machinery.** (A) Representative EM images of VACV infected HeLa cells (8 hpi) showing cis-wrapping (indicated by asterisk), and MVB-IEVs (indicated by arrowheads). Scale bars 500nm. (B) Quantification of the IEV classes. Data is representative of six biological replicates. Data is mean  $\pm$ SEM, representative of n = 80-100 counted viral particles per replicate. (C) Representative images of VACV infected HeLa cell cryosections (8 hpi) where EV membrane protein B5 is immuno labelled with gold. Cisternae wrapped virions indicated by asterisks, and MVB-IEVs indicated by arrowheads. Scale bars 500nm. (D to F) Representative EM images of IMV and MVB-IEV, and quantifications of proportions of these classes. Data is representative of three biological replicates. Data is mean with min and max values. Statistical analysis was performed using unpaired two-tailed t-tests (\*P < 0.05; \*\*P < 0.01; \*\*\*\*P < 0.0001).

### MVBs serve as VACV wrapping organelles

Cisternae-based wrapping has been previously reported (Smith *et al*, 2002; Condit *et al*, 2006; Moss, 2007; Roberts & Smith, 2008); as such in the literature VACV wrapping is “illustrated” as IMVs getting tightly wrapped within double-membrane sheets. However, our results suggest that IEVs can also be formed by

the budding of IMVs into the lumen of MVBs (Fig. 5B 6' and Fig. 6A). To determine if MVB-based wrapping is a common event the proportion of tightly wrapped cisternae-IEVs and MVB-IEVs was quantified using TEM at 8 hpi. We found that approximately equal numbers of cisternae-IEVs and MVB-IEVs, sometimes

containing multiple virions, were formed in infected cells (Fig. 6B).

We reasoned that as part of a productive VACV wrapping pathway that accounts for 50% of IEV formation, these MVB-IEV structures should contain EV membrane proteins. To assess this, immuno-EM directed against the wrapping membrane protein B5 was performed on cryo-EM sections of infected cells. B5 was found in both cisternae and MVBs (Fig. 6C; left). Cisternae in the process of wrapping IMVs were B5-positive (Fig. 6C; middle), as were MVBs containing virions (Fig. 6C; right). We noted that B5 was found on the limiting membrane of MVBs, on the intraluminal vesicles (ILVs) and on the inner EV membrane of virions within (Fig. 6C; left and right). From this we concluded that the virions within these MVB-structures are IEVs.

### VACV MVB-IEV formation is ESCRT dependent

We have demonstrated that components of the ESCRT pathway, namely VPS4B and multiple ESCRT-III components (CHMP1A, CHMP3, CHMP4C and CHMP6) are required for IEV formation and virus spread. Complementing this, we have discovered that B5-positive MVBs appear to serve as a major source of membrane for VACV IMV wrapping. To link these two findings, we asked if MVB-IEV formation requires ESCRT machinery using quantitative TEM. For this, cells were depleted of VPS4A, VPS4B, CHMP1A, CHMP3 or CHMP6 and assessed for MVB-IEV and IMV formation at 8 hpi, as exemplified in Figure 6D. In control cells, 17% of virions could be classified as MVB-IEVs (Fig 6E; siSCR). When cells were depleted of VPS4A the portion of MVB-IEVs dropped to 4%, and when VPS4B was depleted zero IEV-MVBs could be detected (Fig. 6E). Further supporting the role of ESCRT machinery in IMV wrapping, a concomitant increase in the number of IMVs was seen upon VPS4A and B depletion; from 36% in control cells to 52% in the case of VPS4A and 67% in the case of VPS4B (Fig. 6E). Quantification of MVB-IEVs and IMVs in CHMP1A, CHMP3, and CHMP6 depleted cells largely mirrored the VPS4 results. In control cells, 17% of virions were classified as MVB-IEVs (Fig. 6F). While CHMP1A depletion showed no significant difference, the proportion of MVB-IEVs decreased to 5% upon CHMP3 depletion and to 2% upon depletion of CHMP6 (Fig. 6F). Again, the proportion of IMVs increased in cases where MVB-IEVs decreased; from 20% in the control cells to 42% and 49% in CHMP3 and CHMP6 depleted cells, respectively. These results demonstrate that ESCRT-dependent, MVB-based wrapping is a major source of VACV IEV formation, and whose loss results in the accumulation of IMVs that have failed to be wrapped and exocytosed and a concomitant reduction in EEVs released from cells.

## DISCUSSION

Our dual fluorescence-based VACV screen revealed a multitude of cellular functions important for VACV spread. These included SNAP-SNAREs, clathrin and actin related proteins, Rabs, autophagy factors, and ESCRT machinery. Consistent with previous reports the importance of actin-branching, clathrin-mediated endocytosis, Rab proteins, retrograde transport, and endosome-to-golgi transport in VACV spread were highlighted (Chen *et al*, 2009; Sivan *et al*, 2013; Beard *et al*, 2014; Leite & Way, 2015; Harrison *et al*, 2016; Sivan *et al*). Additionally, we identified the ESCRT proteins TSG101 and the AAA ATPase, VPS4A.

Cellular ESCRT machinery is involved in membrane shaping and remodeling reactions in mammalian cells whereby it drives “reverse topology” fission, or closure, of double membranes away from cytoplasm (McCullough *et al*, 2013; Scourfield & Martin-Serrano, 2017; Vietri *et al*, 2020). The hijacking of ESCRT machinery for viral budding, first reported for HIV-1 and Ebola (Garrus *et al*, 2001; Martin-Serrano *et al*, 2001; VerPlank *et al*, 2001; Demirov *et al*, 2002), is now considered a common mechanism used by various enveloped and non-enveloped viruses to mediate the release of infectious virus particles from host cells (Votteler & Sundquist, 2013; Weissenhorn *et al*, 2013; Scourfield & Martin-Serrano, 2017).

For enveloped viruses, ESCRT-mediated budding drives the formation and release of nascent virions at the plasma membrane (Scourfield & Martin-Serrano, 2017; Votteler & Sundquist, 2013). One known exception is HSV-1, which uses ESCRT machinery during multiple stages of egress including primary envelopment at the inner nuclear membrane and secondary envelopment within the cytoplasm (Calistri *et al*, 2007; Crump *et al*, 2007; Pawliczek & Crump, 2009; Crump, 2018; Barnes & Wilson, 2020). Similar to HSV-1, VACV wrapping and egress is a complicated multistep process (see Figure 7). First, single membrane IMVs are wrapped by a virus-modified double membrane within the cytoplasm. These triple-membrane IEVs then move to the plasma membrane and undergo fusion, leaving behind the outmost membrane resulting in the release of a double-membrane EEV (Smith *et al*, 2002; Condit *et al*, 2006; Moss, 2007; Roberts & Smith, 2008; Bidgood & Mercer, 2015).

Consistent with a role for ESCRT in VACV wrapping and/or egress Honeychurch *et al*. (2007) reported that Alix and TSG101 were involved in VACV EEV release. However, compared to HIV-1 for example, VACV does not acquire, but rather leaves behind a membrane at the cell-surface upon exiting. These results suggested to us that ESCRT machinery must be required for a cytoplasmic stage of VACV egress.

Although targeting and assembly factors vary between different ESCRT-dependent processes, ESCRT-III and Vps4 are universally required (Hurley,



2015; Christ *et al*, 2017). While our screen suggested that VPS4A was required for VACV spread, as VPS4B was not targeted in the screen, follow-up individual depletion experiments were performed which indicated that VPS4B was rather the critical factor. These experiments revealed that, in HeLa cells, the relative abundance of VPS4A and VPS4B is markedly different, and that a complex compensatory relationship may exist between these paralogs – consistent with findings in yeast and cancer cells (Scheuring *et al*, 2001; Szymańska *et al*, 2020)

Consistent with our hypothesis, depletion of ESCRT-III components did not impact IMV formation but resulted in a diminution in VACV EEV production. Strikingly, we found that when CHMP1A, CHMP3, CHMP4C or CHMP6 were depleted virions began to accumulate on the limiting membrane of enlarged cytoplasmic structures positive for the VACV EV protein B5, which is required for wrapping (Engelstad & Smith, 1993).

As VACV replicates in the cytoplasm it is perhaps no surprise that it takes advantage of MVBs. As evidenced by our EM images, VACV wrapping sites are fully “open” to cellular membrane structures and ESCRTs are soluble cytoplasmic proteins that facilitate invagination and wrapping of cargoes. Yet, how VACV is targeted the MVBs and how ESCRT is targeted to VACV remains an open question. While we found B5 in MVBs, a second viral protein required for wrapping, F13, contains a late domain, which in retroviruses serve for the recruitment of ESCRT to

viral budding sites (Strack *et al*, 2003; Honeychurch *et al*, 2007; Zhai *et al*, 2008). Determining how these proteins drive MVB-IEV formation will be of future interest.

That we found B5 in ILVs without internalised virions suggests that this protein has an intrinsic capability to be sorted into or drive ILV budding. Interestingly, it's been reported that inhibition of clathrin-mediated endocytosis results in retention of EEV membrane proteins at the plasma membrane, a 50% drop in EEV formation and a reduction in virus spread (Husain & Moss, 2005). While it was suggested that these proteins are recycled for use in cisternal wrapping, in light of our identification of MVB-based wrapping, it seems more likely that recycled EEV membrane proteins continue along the endocytic route and contribute to MVB-IEV formation.

In sum, we have identified ESCRT-dependent IMV wrapping as the second major form of IEV production and B5-positive MVBs as a novel cellular source of VACV wrapping membrane. As the formation of IEVs and subsequently CEVs is critical for virus spread (Roberts & Smith, 2008; Leite & Way, 2015; Beerli *et al*, 2019), it is not surprising that VACV has built in redundancy. By using divergent cellular membrane sources and different wrapping mechanisms- TGN/early endosomes versus MVBs – the virus assures sufficient wrapping membrane and secures its ability to infect neighboring cells.

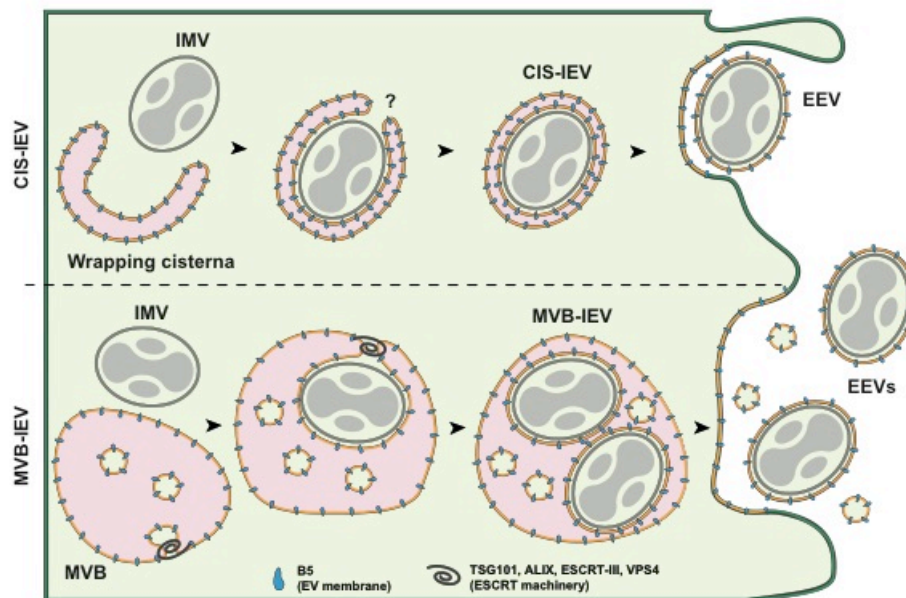

**Figure 7. Model of VACV IEV formation and egress.** The formation of VACV IEVs proceeds through one of two pathways: Cisternae (CIS)-based wrapping (top), or as described in this report multivesicular body (MVB)-based wrapping (bottom). In both cases single membrane IMVs bud into virus-modified cellular membranes. For CIS wrapping, IMV is enveloped in a tight-fitting, double-membrane cisternae derived from the TGN or early endosome resulting in the formation of the triple membrane IEV. During MVB-based wrapping, IMV(s) bud into the lumen of the MVB resulting in the acquisition of a tight second membrane, with the limiting membrane of the MVB effectively becoming the third IEV membrane. While the mechanism and cellular factors that regulate closure of CIS-IEVs is unknown we show that the formation - and presumably closure - of MVB-IEVs depends on cellular ESCRT machinery. Upon formation both CIS- and MVB-IEVs transit to the plasma membrane where they undergo fusion leaving behind the outermost membrane to become double membrane extracellular enveloped virions (EEVs). We found that MVB-based wrapping accounts for half of all VACV wrapping events and subsequent EEV formation.



## MATERIALS AND METHODS

**Cells and viruses** HeLa (ATCC CCL-2) and African green monkey kidney BSC40 (from P. Traktman, Medical University of South Carolina, Charleston, SC, USA) cells were maintained in DMEM supplemented with 10% FBS, 2 mM GlutaMAX and penicillin–streptomycin at 37 °C and 5% CO<sub>2</sub>. BSC40 medium was supplemented with 100 μM non-essential amino acids and 1 mM sodium pyruvate (Thermo Fisher Scientific). HeLa cells have been authenticated by the American Type Culture Collection (ATCC) and BSC40 cells have not been authenticated. Both cell lines were tested regularly and remained mycoplasma free throughout this study. Recombinant VACV strains were based on the VACV strain Western Reserve (WR). Recombinant VACVs were generated using homologous recombination as previously described (Mercer & Helenius, 2008; Schmidt *et al*, 2011). All viruses were produced in BSC-40 cells, and mature virions (MVs) were purified from cytoplasmic lysates through sedimentation as previously described (Mercer & Helenius, 2008).

**Antibodies** Following antibodies were used; anti-GFP rabbit, actin, Tsg101 (Sigma), Alix and CHMP3 (Santa Cruz Biotechnology), Monoclonal and polyclonal anti-B5 (VMC-20 and R182, respectively) were kind gift of G. H. Cohen (University of Pennsylvania, Philadelphia, PA, USA). CHMP1A, CHMP2B, CD63, GM130, and TGN46 (Abcam), CHMP1B (ProteinTech Group), EEA1 and Lamp1 (Cell Signaling). Anti-L1 mouse monoclonal antibody (clone 7D11) was purified from a hybridoma cell line that was provided by B. Moss (National Institutes of Health) with permission of A. Schmaljohn (University of Maryland). IRDye-coupled secondary antibodies and Alexa-secondary antibodies were purchased from Invitrogen/Thermo Fisher Scientific.

**Short interfering RNA silencing** HeLa cells were reversed transfected with scrambled (SCR) or various ESCRT short interfering RNA (siRNA) at a final concentrations of 40nM or 10nM (Vps4A/B in Fig. 2). Transfections were done by using Lipofectamine RNAiMAX transfection reagent (Thermo Fisher Scientific). Seventy-two-hour (or 24 + 24 h for Vps4/B in Fig. 2 and CHMP4A/B/C in Fig 3 and 4) post-transfection cells were either collected for silencing validation or infected with VACV. ON-TARGETplus SMARTpool siRNA for human were purchased from Horizon Discovery (See Tables S1 and S2). AllStars negative control (SCR) and AllStars Death control siRNAs were purchased from Qiagen.

**VACV infections** HeLa cells were seeded on 96 well plates, coverslips or 6 well plates depending on the assay. Cells were infected with VACV WR or recombinant viruses in DMEM without supplements. After 1 h of infection, media was changed to full

DMEM. At indicated time points, cells were fixed with methanol-free formaldehyde for 20 min. Spread screen samples were infected with VACV E-EGFP L-mCherry at MOI 0.02 and infection media was changed to media containing AraC (10μM, Sigma) at 8 hpi.

**Immunofluorescence labelling and imaging** Fixed cells were permeabilized with 0.1% Triton in PBS for 10 min prior to staining. Both primary and secondary antibodies were diluted in 3% BSA in PBS. Antibodies were incubated for 1 h RT, and washed 3 times with 0.5% BSA/PBS after incubations. Samples were mounted with mounting media containing DAPI (Invitrogen). Instead of DAPI-mounting, spread screen samples were labelled with Hoechst (Invitrogen). Confocal fluorescence microscopy was performed using a 100x oil immersion objective (NA 1.45) on a VT-iSIM microscope (Visitech; Nikon Eclipse TI), using 405 nm, 488 nm, 561 nm, 647 nm laser frequencies for excitation.

**High-content image acquisition (spread screen)** Confocal fluorescence microscopic images were acquired using an Opera Phenix (PerkinElmer) high-content screening system using Harmony 4.9 software. 96 well Viewplate (PerkinElmer) microtitre plate geometries were used as plate type setting and was autofocused by the default Two Peak method. Standard 20x (NA = 0.4) air objective was used without camera binning for confocal mode imaging in 3 channels. DAPI channel images (laser excitation = 375 nm, emission = 435-480 nm) were acquired at 3.0 μm focus height with 100% laser power and 1200 ms acquisition time. Alexa 488 channel images (laser excitation = 488 nm, emission = 500-550 nm) were acquired at 6.0 μm focus height with 80% laser power and 400 ms acquisition time. The mCherry channel images (laser excitation = 561 nm, emission = 570-630 nm) were acquired at 6.0 μm focus height with 80% laser power and 800 ms acquisition time. Twenty-five fields of view were imaged in a 5x5 square layout at the centre of each well. The total image acquisition time duration of the 96 wells of one plate was 114 min, with total image data size of 39.1 GB per plate.

**High-content analysis** Images were processed using a SuperServer 4048B-TR4FT system with ImageJ version 1.49 ( <https://imagej.nih.gov/ij/> ). A full plate of 864 images was analysed as a set on each ImageJ instance with a custom ImageJ macro. The image set of a plate was read into the memory and converted into a 3 channel hyperstack. The calculation was iterated on all field of views as the following. A watershed segmentation algorithm with suitably chosen parameter was run on blue nuclei that identified the location of each nucleus based on the local maximum pixel intensities on channel 1. Then the pixel intensity under each nucleus location was

measured on channel 2 (EGFP) and channel 3 (mCherry), resulting in early infection (green, EGFP) and late infection (magenta, mCherry) cell intensity measurements respectively. The resulting cell intensity data was further processed with R (<https://www.r-project.org/>) version 3.2.3, where the ratios “green cell number / blue cell number” and “magenta cell number / blue cell number” were calculated with a custom R script for each well. A suitably chosen 500 and 600 intensity threshold value was used to specify green cells and magenta cells respectively, that showed adequately strong signal.

**Western Blotting** For siRNA depletion validation, samples were scraped into Blue Loading Buffer (Cell Signalling). Lysates were ultrasonicated for 15 min, boiled in reducing sample buffer for 10 min, and centrifugated at 14,000g for 10 min. Samples were then run on 4–12% Bis-Tris gels (Thermo Fisher Scientific) and transferred to nitrocellulose. Membranes were blocked with 5% BSA in 1% Tween/TBS and incubated with primary antibodies either 1 h RT or overnight according to the manufacturer’s recommendations. IRDye-coupled secondary antibodies were used for detection on a LI-COR Odyssey imaging system.

**Mature virion/Extracellular Enveloped Virion 24-h yield** Confluent BSC40 cells in 6-well plates were infected with virus at multiplicity of infection MOI 1 and fed with 1 ml full medium. At 24 hpi the supernatant containing EEVs was collected and cleared of cells by 2× centrifugation at 400g for 10 min. Remaining MVs and partially closed EEVs were neutralized with 7D11 antibody (4 µg/ml) for 1 h +37°C. For IMVs, cells were collected by scraping, centrifuged and resuspended in 100 µl 1 mM Tris (pH 9.0), prior to 3× freeze–thaw. The plaque forming units/ml (pfu/ml) were determined by crystal violet staining of plaques, 48 hpi after serial dilution on confluent monolayers of BSC40 cells.

**RT-qPCR** Total RNA was extracted from siRNA treated cells using the RNeasy Mini kit (Qiagen), 48 and 72 h post-transfection. One µg of total RNA was used for cDNA synthesis with SuperScript reverse transcriptase (Thermo Fisher) and oligo(dT) primer (Invitrogen). RT-qPCR was performed using MESA Blue SYBR Green Mastermix (Eurogentec). Pre-designed primers were purchased from OriGene Technologies. Reactions were analyzed upon an ABI 7000 real-time PCR machine (Thermo Fisher) using the cycle conditions suggested by Eurogentec (MESA Blue). Results were normalized against GAPDH expression. Primer sequences can be found in Supplement Table 2.

**ZedMate quantification** Detection and analysis of the individual virus particles was performed using custom developed ImageJ/Fiji plugin ZedMate (<https://www.biorxiv.org/content/10.1101/820076v2>).

In this plugin, particle detection in three-dimensional micrographs is first performed using the reference channel (e.g. mCherry core) in each individual lateral plain using Laplacian of Gaussian spot detection engine. Then the lateral spots are connected in axial direction. Finally, the intensity measurement is performed for all channels for each particle. According to the signal in the specific channel, particles are sorted into their respective types.

**Electron microscopy** HeLa cells were infected with mCh-A5 VACV with MOI of 10 for 8 h. Samples were fixed with 1.5% glutaraldehyde/2% formaldehyde (EM-grade, TAAB) in 0.1 M sodium cacodylate for 20 min at RT and secondarily fixed for 1 h in 1% osmium tetroxide/1.5% potassium ferricyanide at 4°C. Samples were then treated with 1% tannic acid in 0.1 M sodium cacodylate for 45 min at room temperature and dehydrated in sequentially increasing concentration of ethanol solutions, and embedded in Epon resin. Epon stubs were polymerized by baking at 60°C overnight. The 70 nm thin sections were cut with a Diatome 45° diamond knife using an ultramicrotome (UC7; Leica). Sections were collected on 1 × 2 mm formvar-coated slot grids and stained with Reynolds lead citrate. For cryo-EM cells were fixed with 4% formaldehyde in phosphate buffer for 2 h at room temperature, infused with 2.3 M sucrose, supported in 12% (w/v) gelatin and frozen in liquid nitrogen. Ultrathin (70 nm) cryosections were cut at –120°C and picked up in 1:1 2% sucrose: 2% methylcellulose. Sections were labelled with primary antibody (mouse anti-B5), followed by rabbit anti-mouse intermediate antibody (DAKO) and protein A gold (University of Utrecht). Finally, sections were contrast stained in 1:9 solution of 4% uranyl acetate: 2% methylcellulose solution pH 4.0. TEM micrographs were obtained using a Tecnai T12 Thermo Fisher equipped with a charge-coupled device camera (SIS Morada; Olympus).

## SUPPLEMENT DATA

Supplementary Table 1

Supplementary Table 2

## ACKNOWLEDGEMENTS

We thank David Albrecht for his illustration, which was adapted for this manuscript and Daniel Fisch for the template used to generate the BioRxiv manuscript. We also want to thank G.H Cohen and B. Moss for the VACV antibodies.

M. Huttunen and J. Mercer are supported by core funding to MRC Laboratory for Molecular Cell Biology at University College London (MC\_UU12018/7), A. Yakimovich and J. Mercer by the European Research Council (649101-UbiProPox). I.J. White is supported by MRC core funding to the MRC Laboratory for

Molecular Cell Biology at University College London, award code (MC\_U12266B). J. Kriston-Vizi is supported by UK Medical Research Council core funding to the MRC-UCL University Unit Grant Ref MC\_U12266B and MRC Dementia Platform Grant UK MR/M02492X/1. J. Martin-Serrano is supported by Wellcome Trust (WT102871MA).

The authors declare no competing financial interests.

Author contribution: M. Huttunen and J. Mercer designed the study. M. Huttunen performed all experiments and analysed majority of them. J. Kriston-Vizi performed high-content imaging. A. Yakimovich and J. Kriston-Vizi performed high-content and colocalization (ZedMate) analysis, respectively. I.J. White prepared the EM samples. J. Martin-Serrano and W.I. Sundquist provided valuable comments throughout the project. M. Huttunen and J. Mercer wrote the manuscript with input from other co-authors.

## REFERENCES

- Barnes J & Wilson DW (2020) The ESCRT-II Subunit EAP20/VPS25 and the Bro1 Domain Proteins HD-PTP and BROX Are Individually Dispensable for Herpes Simplex Virus 1 Replication. *J. Virol.* **94**:
- Beard PM, Griffiths SJ, Gonzalez O, Haga IR, Pechenick Jowers T, Reynolds DK, Wildenhain J, Tekotte H, Auer M, Tyers M, Ghazal P, Zimmer R & Haas J (2014) A Loss of Function Analysis of Host Factors Influencing Vaccinia virus Replication by RNA Interference. *PLoS One* **9**: e98431
- Berli C, Yakimovich A, Kilcher S, Reynoso G V., Fläschner G, Müller DJ, Hickman HD & Mercer J (2019) Vaccinia virus hijacks EGFR signalling to enhance virus spread through rapid and directed infected cell motility. *Nat. Microbiol.* **4**: 216–225
- Bidgood SR & Mercer J (2015) Cloak and Dagger: Alternative Immune Evasion and Modulation Strategies of Poxviruses. *Viruses* **7**: 4800–25
- Calistri A, Sette P, Salata C, Cancellotti E, Forghieri C, Comin A, Göttlinger H, Campadelli-Fiume G, Palù G & Parolin C (2007) Intracellular Trafficking and Maturation of Herpes Simplex Virus Type 1 gB and Virus Egress Require Functional Biogenesis of Multivesicular Bodies. *J. Virol.* **81**: 11468–11478
- Chen Y, Honeychurch KM, Yang G, Byrd CM, Harver C, Hruby DE & Jordan R (2009) Vaccinia virus p37 interacts with host proteins associated with LE-derived transport vesicle biogenesis. *Virol. J.* **6**: 44
- Christ L, Raiborg C, Wenzel EM, Campsteijn C & Stenmark H (2017) Cellular Functions and Molecular Mechanisms of the ESCRT Membrane-Scission Machinery. *Trends Biochem. Sci.* **42**: 42–56
- Condit RC, Moussatche N & Traktman P (2006) In A Nutshell: Structure and Assembly of the Vaccinia Virion. *Adv. Virus Res.* **65**: 31–124
- Crump C (2018) Virus assembly and egress of HSV. In *Advances in Experimental Medicine and Biology* pp 23–44. Springer New York LLC
- Crump CM, Yates C & Minson T (2007) Herpes simplex virus type 1 cytoplasmic envelopment requires functional Vps4. *J. Virol.* **81**: 7380–7
- Demirov DG, Ono A, Orenstein JM & Freed EO (2002) Overexpression of the N-terminal domain of TSG101 inhibits HIV-1 budding by blocking late domain function. *Proc. Natl. Acad. Sci. U. S. A.* **99**: 955–960
- Engelstad M & Smith GL (1993) The vaccinia virus 42-kDa envelope protein is required for the envelopment and egress of extracellular virus and for virus virulence. *Virology* **194**: 627–637
- Furth JJ & Cohen SS (1968) Inhibition of mammalian DNA polymerase by the 5'-triphosphate of 1-beta-D-arabinofuranosylcytosine and the 5'-triphosphate of 9-beta-D-arabinofuranoxyladenine. *Cancer Res.* **28**: 2061–7
- Garrus JE, Von Schwedler UK, Pornillos OW, Morham SG, Zavitz KH, Wang HE, Wettstein DA, Stray KM, Côté M, Rich RL, Myszka DG & Sundquist WI (2001) Tsg101 and the vacuolar protein sorting pathway are essential for HIV-1 budding. *Cell* **107**: 55–65
- Glingston RS, Deb R, Kumar S & Nagotu S (2019) Organelle dynamics and viral infections: at cross roads. *Microbes Infect.* **21**: 20–32
- Harrison K, Haga IR, Pechenick Jowers T, Jasim S, Cintrat J-C, Gillet D, Schmitt-John T, Digard P & Beard PM (2016) Vaccinia Virus Uses Retromer-Independent Cellular Retrograde Transport Pathways To Facilitate the Wrapping of Intracellular Mature Virions during Virus Morphogenesis. *J. Virol.* **90**: 10120–10132
- Hiller G & Weber K (1985) Golgi-Derived Membranes That Contain an Acylated Viral Polypeptide Are Used for Vaccinia Virus Envelopment. *J. Virol.* **55**: 651–659
- Honeychurch KM, Yang G, Jordan R & Hruby DE (2007) The vaccinia virus F13L YPPL motif is required for efficient release of extracellular enveloped virus. *J. Virol.* **81**: 7310–5
- Huang DW, Sherman BT & Lempicki RA (2009a) Bioinformatics enrichment tools: Paths toward the comprehensive functional analysis of large gene lists. *Nucleic Acids Res.* **37**: 1–13
- Huang DW, Sherman BT & Lempicki RA (2009b) Systematic and integrative analysis of large gene lists using DAVID bioinformatics resources. *Nat. Protoc.* **4**: 44–57
- Hurley JH (2015) ESCRT s are everywhere. *EMBO J.* **34**: 2398–2407
- Husain M & Moss B (2001) Vaccinia Virus F13L Protein with a Conserved Phospholipase Catalytic Motif Induces Colocalization of the B5R



- Envelope Glycoprotein in Post-Golgi Vesicles. *J. Virol.* **75**: 7528–7542
- Husain M & Moss B (2005) Role of receptor-mediated endocytosis in the formation of vaccinia virus extracellular enveloped particles. *J. Virol.* **79**: 4080–4089
- Leite F & Way M (2015) The role of signalling and the cytoskeleton during Vaccinia Virus egress. *Virus Res.* **209**: 87–99
- Martin-Serrano J, Zang T & Bieniasz PD (2001) HIV-1 and Ebola virus encode small peptide motifs that recruit Tsg101 to sites of particle assembly to facilitate egress. *Nat. Med.* **7**: 1313–1319
- McCullough J, Colf LA & Sundquist WI (2013) Membrane Fission Reactions of the Mammalian ESCRT Pathway. *Annu. Rev. Biochem.* **82**: 663–692
- Mercer J & Helenius A (2008) Vaccinia virus uses macropinocytosis and apoptotic mimicry to enter host cells. *Science* **320**: 531–5
- Mercer J, Schelhaas M & Helenius A (2010) Virus Entry by Endocytosis. *Annu. Rev. Biochem.* **79**: 803–833
- Moloughney JG, Monken CE, Tao H, Zhang H, Thomas JD, Lattime EC & Jin S (2011) Vaccinia virus leads to ATG12–ATG3 conjugation and deficiency in autophagosome formation. *Autophagy* **7**: 1434–47
- Moss B (2007) Poxviridae: The viruses and their replication. In *Fields Virology*, Knipe DM & Howley PM (eds) pp 2905–2946. Lippincott Williams & Wilkins
- Pawliczek T & Crump CM (2009) Herpes Simplex Virus Type 1 Production Requires a Functional ESCRT-III Complex but Is Independent of TSG101 and ALIX Expression. *J. Virol.* **83**: 11254–11264
- Roberts KL & Smith GL (2008) Vaccinia virus morphogenesis and dissemination. *Trends Microbiol.* **16**: 472–479
- Schabel Jr. FM (1968) The antiviral activity of 9-beta-D-arabinofuranosyladenine (ARA-A). *Chemotherapy* **13**: 321–338
- Scheuring S, Röhricht RA, Schöning-Burkhardt B, Beyer A, Müller S, Abts HF & Köhrer K (2001) Mammalian cells express two VPS4 proteins both of which are involved in intracellular protein trafficking. *J. Mol. Biol.* **312**: 469–480
- Schmelz M, Sodeik B, Ericsson M, Wolffe EJ, Shida H, Hiller G & Griffiths G (1994) Assembly of Vaccinia Virus: the Second Wrapping Cisterna Is Derived from the Trans Golgi Network. *J. Virol.* **68**: 130–147
- Schmidt FI, Bleck CKE, Helenius A & Mercer J (2011) Vaccinia extracellular virions enter cells by macropinocytosis and acid-activated membrane rupture. *EMBO J.* **30**: 3647–61
- Scourfield EJ & Martin-Serrano J (2017) Growing functions of the ESCRT machinery in cell biology and viral replication.
- Sivan G, Martin SE, Myers TG, Buehler E, Szymczyk KH, Ormanoglu P & Moss B (2013) Human genome-wide RNAi screen reveals a role for nuclear pore proteins in poxvirus morphogenesis. *Proc. Natl. Acad. Sci. U. S. A.* **110**: 3519–3524
- Sivan G, Weisberg AS, Americo JL & Moss B (2016) Retrograde Transport from Early Endosomes to the trans-Golgi Network Enables Membrane Wrapping and Egress of Vaccinia Virus Virions. *J. Virol.* **90**: 8891–8905
- Smith GL, Vanderplasschen A, Law M, Byrd CM, Harver C, Hruby DE, Jordan R, Smith G, Vanderplasschen A, Law M, Moss B, Schmelz M, Sodeik B, Ericsson M, Wolffe E, Shida H, Hiller G, Griffiths G, Tooze J, Hollinshead M, et al (2002) The formation and function of extracellular enveloped vaccinia virus. *J. Gen. Virol.* **83**: 2915–2931
- Strack B, Calistri A, Craig S, Popova E & Göttlinger HG (2003) AIP1/ALIX is a binding partner for HIV-1 p6 and EIAV p9 functioning in virus budding. *Cell* **114**: 689–699
- Szklarczyk D, Gable AL, Lyon D, Junge A, Wyder S, Huerta-Cepas J, Simonovic M, Doncheva NT, Morris JH, Bork P, Jensen LJ & Von Mering C (2019) STRING v11: Protein-protein association networks with increased coverage, supporting functional discovery in genome-wide experimental datasets. *Nucleic Acids Res.* **47**: D607–D613
- Szymańska E, Nowak P, Kolmus K, Cybulska M, Goryca K, Derezińska-Wołek E, Szumera-Ciećkiewicz A, Brewińska-Olchowik M, Grochowska A, Piwocka K, Prochorec-Sobieszek M, Mikula M & Miączyńska M (2020) Synthetic lethality between VPS 4A and VPS 4B triggers an inflammatory response in colorectal cancer. *EMBO Mol. Med.* **12**: 1–12
- Tooze J, Hollinshead M, Reis B, Radsak K & Kern H (1993) Progeny vaccinia and human cytomegalovirus particles utilize early endosomal cisternae for their envelopes. *Eur. J. Cell Biol.* **60**: 163–178
- Ulaeto D, Grosenbach D & Hruby DE (1995) Brefeldin A inhibits vaccinia virus envelopment but does not prevent normal processing and localization of the putative envelopment receptor P37. *J. Gen. Virol.* **76**: 103–111
- VerPlank L, Bouamr F, LaGrassa TJ, Agresta B, Kikonyogo A, Leis J & Carter CA (2001) Tsg101, a homologue of ubiquitin-conjugating (E2) enzymes, binds the L domain in HIV type 1 Pr55Gag. *Proc. Natl. Acad. Sci. U. S. A.* **98**: 7724–7729
- Vietri M, Radulovic M & Stenmark H (2020) The many functions of ESCRTs. *Nat. Rev. Mol. Cell Biol.*

**21: 25–42**

- Votteler J & Sundquist WI (2013) Virus budding and the ESCRT pathway. *Cell Host Microbe* **14**: 232–241
- Weissenhorn W, Poudevigne E, Effantin G & Bassereau P (2013) How to get out: ssRNA enveloped viruses and membrane fission. *Curr. Opin. Virol.* **3**: 159–167
- Welsch S, Müller B & Kräusslich HG (2007) More than one door - Budding of enveloped viruses through cellular membranes. *FEBS Lett.* **581**: 2089–2097
- Zhai Q, Fisher RD, Chung HY, Myszka DG, Sundquist WI & Hill CP (2008) Structural and functional studies of ALIX interactions with YPX nL late domains of HIV-1 and EIAV. *Nat. Struct. Mol. Biol.* **15**: 43–49
